# Supplementary material
Source: publisher figshare collection journal article supplement (https://karger.figshare.com/ndownloader/files/27339245)
Supplement: Supplementary file 1 [file 27339245]

## ***Research Article***

### ***Kidney biopsy in Type 2 Diabetes: a multicenter cross-sectional study***

#### ***Supplementary Material***

Jonathan M Chemouny, MD, PhD<sup>a</sup>, Mickaël Bobot, MD<sup>b,c</sup>, Aurélie Sannier, MD, PhD<sup>d,e</sup>, Valentin Maisons, MD<sup>f</sup>, Noémie Jourde-Chiche, MD, PhD<sup>b,c</sup>, Elsa Ferriere, MD<sup>g</sup>, Dominique Joly, MD, PhD<sup>g</sup>, Cécile Vigneau, MD, PhD<sup>h</sup>, Nathalie Rioux-Leclercq, MD, PhD<sup>h</sup>, Christophe Barba, MD<sup>i</sup>, Laurent Daniel, MD, PhD<sup>b,j</sup>, Jean-Michel Halimi, MD, PhD<sup>f,k</sup>, François Vrtovsnik, MD, PhD<sup>e,i</sup>

<sup>a</sup> Univ Rennes, CHU Rennes, Inserm, EHESP, Irset (Institut de recherche en santé, environnement et travail) - UMR\_S 1085, CIC-P 1414 (Centre d'investigation clinique), F-35000 Rennes, France

<sup>b</sup> Aix-Marseille Univ, INSERM, INRAE, C2VN, Marseille, France

<sup>c</sup> AP-HM, Centre de Néphrologie et Transplantation Rénale, Hôpital de la Conception, Marseille, France

<sup>d</sup> Laboratoire d'anatomie et cytologie pathologiques, AP-HP, Hôpital Bichat-Claude Bernard, F-75018 Paris, France

<sup>e</sup> Université de Paris, F-75018 Paris, France

<sup>f</sup> CHU Tours, Service de Néphrologie et d'Immunologie Clinique, Tours, France

<sup>g</sup> Service de Néphrologie, Faculté de Médecine, Hôpital Necker-Enfants Malades, Université Paris-Descartes, Assistance Publique - Hôpitaux de Paris, Paris, France

<sup>h</sup> Univ Rennes, CHU Rennes, Inserm, EHESP, Irset (Institut de recherche en santé, environnement et travail) - UMR\_S 1085, F-35000 Rennes, France

<sup>i</sup> Service de néphrologie, Hôpital Bichat-Claude Bernard, AP-HP, DHU Fire, Paris 75018 Paris

<sup>j</sup> AP-HM, Laboratoire d'anatomopathologie, Hôpital de la Timone, Marseille, France

<sup>k</sup> Université de Tours, INI-CRCT, Tours, France

**Running head:** Kidney biopsy indications in Type 2 diabetes

#### **Corresponding author:**

Dr. Jonathan Chemouny

Service de néphrologie,

CHU de Rennes – Hôpital Pontchaillou,

2 rue Henri Le Guilloux, 35033, Rennes, France

Tel +33 2 99 28 43 96

Fax: +33 2 99 28 41 50

E-mail: [jonathan.chemouny@chu-rennes.fr](mailto:jonathan.chemouny@chu-rennes.fr)

## SUPPLEMENTARY METHODS

### Biopsy selection: Definitions

Type 2 diabetes was defined as self-reported T2D, history of T2D recorded in the medical record, fasting blood glucose concentration > 7mmol/l on two (or more) occasions, and/or random venous plasma glucose concentration > 11.1mmol/l.

Hypertension was defined as self-reported hypertension, history of hypertension recorded in the medical record, systolic blood pressure > 140 mmHg and/or diastolic blood pressure > 90 mmHg or antihypertensive medication.

Hematuria was diagnosed by urine dipstick (considered positive from 10 erythrocytes/ $\mu$ L) of urine cytology, according to the policy of each center.

Diabetes duration was defined as the time from the diagnosis of diabetes to the time of the kidney biopsy.

Adverse event attributable to the kidney biopsy was defined as any event mentioned as such in the patient's record at the time of the biopsy.

Serious adverse events were defined as the need for blood transfusion, arterial embolization, prolonged stay in the hospital or death.

### Biopsy indications: Definitions of the indication categories

Other atypical feature: presence of any atypical feature suggesting non-diabetic or hypertensive kidney disease (NDHKD) recorded in the patients' medical chart not listed below including acute kidney injury (AKI) stage 1 or more as defined by the KDIGO guidelines on AKI (1)). Presence of any feature compatible with this definition was considered an *other atypical feature* even if it was not mentioned as a motivation to perform the biopsy (e.g. Monoclonal gammopathy).

Recent onset of nephrotic syndrome: Occurrence of proteinuria > 3g/day or urinary-protein-to-creatinine ratio (UPCR) > 3g/g and serum albumin below 30g/l datable through apparition of clinical symptoms such as edema or anterior laboratory exam results.

Low or rapidly declining eGFR\*: any decrease in eGFR considered as too fast by the referent nephrologist excluding AKI stage 1 or more but including acute kidney diseases and disorders (2).

Absence of proteinuria: Proteinuria < 0.5 g/day or UPCR > 0.5 g/g

Rapid increase in proteinuria\*: any increase in proteinuria or UPCR considered as too fast by the referent nephrologist (excluding any reduction in renin-angiotensin blockade)

Short or unknown duration of diabetes: Diabetes duration considered as too low by the referent nephrologist as regard to the appearance of proteinuria or decline in eGFR. By extension, all patients with a diabetes duration lower than the maximum duration in this group was considered to have a *Short or unknown duration of diabetes*.

Presence of hematuria: >10 erythrocytes/ $\mu$ L or positive dipstick analysis according to the policy of each center without anatomical abnormality.

Absence of diabetic retinopathy: Absence of diabetic retinopathy with a last retinal examination in the past year.

\* These atypical features are mainly based on the attending nephrologist since it was not possible to define threshold retrospectively for these features which are not defined by the guidelines or any other alternative source.

### **Biopsy indications: Disambiguation of atypical feature and biopsy indication appellations**

To avoid further confusion between the atypical feature and the indication group defined by short duration of diabetes, hematuria and absence of diabetic retinopathy, the atypical features will be hereafter referred to as diabetes duration under 5 years, presence of hematuria and absence of diabetic retinopathy and the indication groups as *short or unknown duration of diabetes*, *presence of hematuria* and *normal retinal examination*. See supplementary material for a definition of each atypical feature.

### **Statistical analyses: handling of missing data**

For the diabetic retinopathy status, we assumed that the nephrology team did not know the diabetic retinopathy status at the time of KB when it was not mentioned in the biopsy hospitalization report, either because of the absence of retinal examination before the biopsy or because the diabetic retinopathy status was considered irrelevant as regard to the nephrological situation. Therefore, observations for which only the diabetic retinopathy status was missing were considered as complete with an unknown diabetic retinopathy status. The *diabetic retinopathy* variable could take the following value: absence of diabetic retinopathy (=reference), unknown status, presence of non-proliferative diabetic retinopathy, or presence of proliferative diabetic retinopathy. Conversely, observations with any missing data but diabetic retinopathy status were discarded.

### **Statistical analyses: establishing threshold for continuous variables.**

For each of them the threshold was chosen after running several logistic regressions with different values across the range of variables. The threshold with the least residual deviance was chosen for the subsequent logistic regressions (see supplementary table 1).

### **Statistical analyses: multivariate logistic regression.**

Models were developed starting with a full model and removing sequentially the variables with the least deviance and the highest p-values from the model. This new model was tested against the previous one. We retained the last model, which did not show a significant deterioration of the fit of the model compared to the previous one. For multivariate analyses of NDHKD predictors in the sub-population without *other atypical feature*, only two models based on a non-adjusted p-value < 0.05 and similar to the final models from the total population were tested because of the few cases of NDHKD with complete data in this population.

|                                                                | Residual deviance | Odds ratio | 95% CI      | p value |
|----------------------------------------------------------------|-------------------|------------|-------------|---------|
| <b>HbA1c &gt; 7 %</b>                                          | 478.96            | 0.49       | [0.31-0.76] | 0.001   |
| <b>HbA1c &gt; 8 %</b>                                          | 479.69            | 0.44       | [0.25-0.74] | 0.002   |
| <b>HbA1c &gt; 8.5 %</b>                                        | 481.47            | 0.43       | [0.23-0.78] | 0.005   |
| <b>HbA1c &gt; 7.5 %</b>                                        | 482.26            | 0.53       | [0.33-0.85] | 0.008   |
| <b>HbA1c &gt; 9.5 %</b>                                        | 482.47            | 0.33       | [0.12-0.77] | 0.009   |
| <b>HbA1c &gt; 10 %</b>                                         | 482.66            | 0.24       | [0.06-0.73] | 0.009   |
| <b>HbA1c &gt; 6 %</b>                                          | 484.40            | 0.57       | [0.35-0.93] | 0.025   |
| <b>HbA1c &gt; 9 %</b>                                          | 484.61            | 0.46       | [0.21-0.92] | 0.029   |
| <b>HbA1c &gt; 6.5 %</b>                                        | 486.48            | 0.69       | [0.45-1.06] | 0.088   |
| <b>Age &gt; 65 y.o.</b>                                        | 619.35            | 1.55       | [1.07-2.25] | 0.022   |
| <b>Age &gt; 70 y.o.</b>                                        | 620.39            | 1.52       | [1.02-2.28] | 0.039   |
| <b>Age &gt; 60 y.o.</b>                                        | 620.52            | 1.52       | [1.01-2.28] | 0.042   |
| <b>Age &gt; 55 y.o.</b>                                        | 620.90            | 1.61       | [0.99-2.67] | 0.053   |
| <b>Age &gt; 50 y.o.</b>                                        | 621.44            | 1.85       | [0.94-3.83] | 0.074   |
| <b>Age &gt; 75 y.o.</b>                                        | 622.28            | 1.49       | [0.90-2.47] | 0.124   |
| <b>Duration of diabetes &gt; 5 years</b>                       | 502.17            | 0.44       | [0.28-0.67] | <0.001  |
| <b>Duration of diabetes &gt; 10 years</b>                      | 512.88            | 0.66       | [0.43-1.00] | 0.048   |
| <b>Duration of diabetes &gt; 15 years</b>                      | 515.46            | 0.76       | [0.47-1.21] | 0.250   |
| <b>eGFR<sub>CKD-EPI</sub> &gt; 15 ml/min/1.73m<sup>2</sup></b> | 601.70            | 0.41       | [0.27-0.61] | <0.001  |
| <b>eGFR<sub>CKD-EPI</sub> &gt; 30 ml/min/1.73m<sup>2</sup></b> | 607.20            | 0.48       | [0.32-0.71] | <0.001  |
| <b>eGFR<sub>CKD-EPI</sub> &gt; 45 ml/min/1.73m<sup>2</sup></b> | 616.97            | 0.63       | [0.39-0.99] | 0.045   |
| <b>eGFR<sub>CKD-EPI</sub> &gt; 90 ml/min/1.73m<sup>2</sup></b> | 618.46            | 2.12       | [0.84-5.57] | 0.111   |
| <b>eGFR<sub>CKD-EPI</sub> &gt; 75 ml/min/1.73m<sup>2</sup></b> | 620.02            | 1.39       | [0.72-2.67] | 0.323   |
| <b>eGFR<sub>CKD-EPI</sub> &gt; 60 ml/min/1.73m<sup>2</sup></b> | 620.45            | 0.81       | [0.46-1.40] | 0.458   |
| <b>UPCR &gt; 0.3 g/mmol</b>                                    | 537.91            | 0.37       | [0.25-0.56] | <0.001  |
| <b>UPCR &gt; 0.4 g/mmol</b>                                    | 544.85            | 0.42       | [0.28-0.65] | <0.001  |
| <b>UPCR &gt; 0.2 g/mmol</b>                                    | 546.69            | 0.46       | [0.31-0.69] | <0.001  |
| <b>UPCR &gt; 0.5 g/mmol</b>                                    | 550.30            | 0.48       | [0.30-0.74] | 0.001   |
| <b>UPCR &gt; 0.6 g/mmol</b>                                    | 554.27            | 0.53       | [0.33-0.85] | 0.008   |
| <b>UPCR &gt; 0.1 g/mmol</b>                                    | 555.27            | 0.57       | [0.36-0.89] | 0.015   |

**Supplementary Table 2: Details of other atypical findings**

|                                                                      | <b>n (%)</b> | <b>% total population</b> | <b>% other atypical findings</b> |
|----------------------------------------------------------------------|--------------|---------------------------|----------------------------------|
| <b>Acute kidney injury</b>                                           | 73           | 15.8%                     | 24.5%                            |
| <b>Monoclonal gammopathy</b>                                         | 49           | 10.6%                     | 16.4%                            |
| <b>Active infectious disease and-or antibiotic therapy</b>           | 29           | 6.3%                      | 9.7%                             |
| <b>ANCA</b>                                                          | 25           | 5.4%                      | 8.4%                             |
| <b>Diagnosed immunological disease with extrarenal manifestation</b> | 23           | 5.0%                      | 7.7%                             |
| <b>Extrarenal manifestations without diagnosis</b>                   | 18           | 3.9%                      | 6.0%                             |
| <b>Purpuric rash</b>                                                 | 17           | 3.7%                      | 5.7%                             |
| <b>Auto-antibodies</b>                                               | 15           | 3.2%                      | 5.0%                             |
| <b>Malignancy</b>                                                    | 14           | 3.0%                      | 4.7%                             |
| <b>Recipient of non-renal solid organ transplant</b>                 | 11           | 2.4%                      | 3.7%                             |
| <b>Nephrotoxic exposure</b>                                          | 6            | 1.3%                      | 2.0%                             |
| <b>Proteinuria recorded prior to diabetes onset</b>                  | 6            | 1.3%                      | 2.0%                             |
| <b>Cirrhosis</b>                                                     | 5            | 1.1%                      | 1.7%                             |
| <b>Other</b>                                                         | 5            | 1.1%                      | 1.7%                             |
| <b>Familial history</b>                                              | 2            | 0.4%                      | 0.7%                             |

**Supplementary Table 3:** Histological lesions in patients with DN and/or HN

|                                                      | Total population | Isolated DN | Isolated HN | DN and HN   | p-value          |
|------------------------------------------------------|------------------|-------------|-------------|-------------|------------------|
| n (%)                                                | 276              | 175 (63.4%) | 35 (12.7%)  | 66 (23.9%)  |                  |
| Number of glomeruli,<br>median [IQR]                 | 16 [12-20]       | 15[11-20]   | 18[14-20]   | 20[14-25]   | <b>&lt;0.001</b> |
| Glomeruli with global GS,<br>median [IQR]            | 5 [2-8]          | 5[2-7]      | 6[2-7]      | 6.5[2-11]   | 0.249            |
| Percent of glomeruli with<br>global GS, median [IQR] | 29 [17-50]       | 27[17-47]   | 32[19-46]   | 33.5[15-54] | 0.947            |
| Glomerular classification                            |                  |             |             |             | <b>&lt;0.001</b> |
| I                                                    | 6 (3.2%)         | 2 (1.5%)    | 4 (40%)     | 0 (0%)      |                  |
| IIa                                                  | 37 (19.6%)       | 22 (16.5%)  | 3 (30%)     | 12 (26.1%)  |                  |
| IIb                                                  | 22 (11.6%)       | 17 (12.8%)  | 1 (10%)     | 4 (8.7%)    |                  |
| III                                                  | 75 (39.7%)       | 61 (45.9%)  | 1 (10%)     | 13 (28.3%)  |                  |
| IV                                                   | 43 (22.8%)       | 29 (21.8%)  | 1 (10%)     | 13 (28.3%)  |                  |
| Uncertain                                            | 5 (2.6%)         | 2 (1.5%)    | 0 (0%)      | 3 (6.5%)    |                  |
| IFTA                                                 |                  |             |             |             | 0.308            |
| 0                                                    | 2 (1.1%)         | 2 (1.5%)    | 0 (0%)      | 0 (0%)      |                  |
| 1                                                    | 45 (23.8%)       | 29 (21.8%)  | 1 (10%)     | 15 (32.6%)  |                  |
| 2                                                    | 65 (34.4%)       | 44 (33.1%)  | 7 (70%)     | 14 (30.4%)  |                  |
| 3                                                    | 76 (40.2%)       | 57 (42.9%)  | 2 (20%)     | 17 (37%)    |                  |
| Interstitial inflammation                            |                  |             |             |             | <b>0.042</b>     |
| 0 (<10% of cortex)                                   | 131 (69.3%)      | 91 (68.4%)  | 4 (40%)     | 36 (78.3%)  |                  |
| 1 (10%-25%)                                          | 48 (25.4%)       | 35 (26.3%)  | 4 (40%)     | 9 (19.6%)   |                  |
| 2 (26%-50%)                                          | 8 (4.2%)         | 6 (4.5%)    | 1 (10%)     | 1 (2.2%)    |                  |
| 3 (severe, >50%)                                     | 1 (0.5%)         | 0 (0%)      | 1 (10%)     | 0 (0%)      |                  |
| Arteriosclerosis                                     |                  |             |             |             | 0.056            |
| 1                                                    | 95 (50.3%)       | 76 (57.1%)  | 2 (20%)     | 17 (37%)    |                  |
| 2                                                    | 84 (44.4%)       | 49 (36.8%)  | 8 (80%)     | 27 (58.7%)  |                  |
| No artery on the biopsy                              | 2 (1.1%)         | 1 (0.8%)    | 0 (0%)      | 1 (2.2%)    |                  |
| Arteriolar hyalinosis                                |                  |             |             |             | 0.241            |
| 0                                                    | 11 (5.8%)        | 5 (3.8%)    | 0 (0%)      | 6 (13%)     |                  |
| 1                                                    | 47 (24.9%)       | 32 (24.1%)  | 4 (40%)     | 11 (23.9%)  |                  |
| 2                                                    | 130 (68.8%)      | 95 (71.4%)  | 6 (60%)     | 29 (63.0%)  |                  |

DN diabetic nephropathy, HN hypertensive nephropathy, IQR interquartile range, GS glomerulosclerosis

**Supplementary Table 4:** Details of NDHRD diagnoses by biopsy indications

| <b>Biopsy indications</b>            | <b>Diagnoses</b>                                                                                                                                                                                                                                                                                                                                                                                                                                                                                                                                                                                                                     |
|--------------------------------------|--------------------------------------------------------------------------------------------------------------------------------------------------------------------------------------------------------------------------------------------------------------------------------------------------------------------------------------------------------------------------------------------------------------------------------------------------------------------------------------------------------------------------------------------------------------------------------------------------------------------------------------|
| <b>Other atypical feature</b>        | Acute interstitial nephritis: 35 (21.9%)<br>IgAN: 33 (20.6%)<br>ATN: 21 (13.1%)<br>AAV: 18 (11.3%)<br>FSGS: 8 (5%)<br>MGRS: 7 (4.4%)<br>Crescentic GN: 6 (3.8%)<br>Membranoproliferative glomerulonephritis: 6 (3.8%)<br>Acute glomerulonephritis: 5 (3.1%)<br>Chronic interstitial nephritis: 4 (2.5%)<br>Nephrolithiasis: 3 (1.9%)<br>Lupus nephritis: 2 (1.3%)<br>MCD: 2 (1.3%)<br>Pyelonephritis: 2 (1.3%)<br>Thrombotic microangiopathy: 2 (1.3%)<br>Alport syndrome: 1 (0.6%)<br>Cholesterol embolism: 1 (0.6%)<br>CNI toxicity: 1 (0.6%)<br>Drug nephrotoxicity: 1 (0.6%)<br>Goodpasture: 1 (0.6%)<br>Membranous GN: 1 (0.6%) |
| <b>Recent nephrotic syndrome</b>     | MCD: 4 (40.0%)<br>Acute interstitial nephritis: 3 (30.0%)<br>Membranous nephropathy: 2 (20.0%)<br>FSGS: 1 (10.0%)                                                                                                                                                                                                                                                                                                                                                                                                                                                                                                                    |
| <b>Low or rapidly decreasing GFR</b> | FSGS: 3 (20.0%)<br>Acute interstitial nephritis: 2 (13.3%)<br>IgAN: 2 (13.3%)<br>Crescentic GN: 2 (13.3%)<br>Chronic interstitial nephritis: 2 (13.3%)<br>Membranous nephropathy: 1 (6.7%)<br>ATN: 1 (6.7%)<br>Nephrolithiasis: 1 (6.7%)<br>Cholesterol embolism: 1 (6.7%)                                                                                                                                                                                                                                                                                                                                                           |
| <b>Rapid increase of proteinuria</b> | FSGS: 1 (50.0%)<br>Crescentic GN: 1 (50.0%)                                                                                                                                                                                                                                                                                                                                                                                                                                                                                                                                                                                          |

**Supplementary Table 5** Details of NDHKD diagnoses by biopsy indications in the other atypical features group

|                                                    | <b>Acute kidney injury<br/>(n=73)</b> | <b>ANCA<br/>(n=25)</b> | <b>Purpuric rash<br/>(n=17)</b> | <b>Monoclonal gammopathy<br/>(n=49)</b> |
|----------------------------------------------------|---------------------------------------|------------------------|---------------------------------|-----------------------------------------|
| <b>Acute interstitial nephritis</b>                | 21 (28.8%)                            | 1 (4.0%)               |                                 | 2 (4.1%)                                |
| <b>IgA nephropathy</b>                             | 7 (9.6%)                              | 1 (4.0%)               | 16 (94.1%)                      |                                         |
| <b>Acute tubular necrosis</b>                      | 16 (21.9%)                            |                        |                                 | 2 (4.1%)                                |
| <b>ANCA-associated vasculitis</b>                  | 1 (1.4%)                              | 16 (64.0%)             |                                 |                                         |
| <b>Focal and segmental glomerulosclerosis</b>      | 4 (5.5%)                              |                        |                                 |                                         |
| <b>Monoclonal gammopathy of renal significance</b> |                                       |                        |                                 | 7 (14.3%)                               |
| <b>Membranoproliferative glomerulonephritis</b>    | 2 (2.7%)                              |                        |                                 |                                         |
| <b>ANCA-negative crescentic glomerulonephritis</b> |                                       | 2 (8.0%)               |                                 |                                         |
| <b>Acute glomerulonephritis</b>                    | 3 (4.1%)                              |                        | 1 (5.9%)                        |                                         |
| <b>Chronic interstitial nephritis</b>              | 1 (1.4%)                              |                        |                                 |                                         |
| <b>Nephrolithiasis</b>                             | 3 (4.1%)                              |                        |                                 |                                         |
| <b>Pyelonephritis</b>                              | 1 (1.4%)                              |                        |                                 |                                         |
| <b>Lupus nephritis</b>                             |                                       |                        |                                 |                                         |
| <b>Thrombotic microangiopathy</b>                  |                                       |                        |                                 |                                         |
| <b>Minimal change disease</b>                      |                                       |                        |                                 | 1 (2.0%)                                |
| <b>Cholesterol embolism</b>                        | 1 (1.4%)                              |                        |                                 |                                         |
| <b>Other drug nephrotoxicity</b>                   |                                       |                        |                                 |                                         |
| <b>Alport syndrome</b>                             |                                       |                        |                                 |                                         |
| <b>Membranous nephropathy</b>                      |                                       |                        |                                 |                                         |
| <b>Toxicity of calcineurin inhibitors</b>          |                                       |                        |                                 |                                         |
| <b>Anti-glomerular basement membrane disease</b>   |                                       |                        |                                 |                                         |

**Supplementary Table 5 (continued):** Details of NDHKD diagnoses by biopsy indications in the other atypical features group

|                                             | Diagnosed immunological disease<br>with extrarenal manifestation<br>(n=23) | Active infectious disease and-or<br>antibiotic therapy (n=29) | Extrarenal manifestations<br>without diagnosis (n=18) |
|---------------------------------------------|----------------------------------------------------------------------------|---------------------------------------------------------------|-------------------------------------------------------|
| Acute interstitial nephritis                | 4 (17.4%)                                                                  | 3 (10.3%)                                                     | 2 (11.1%)                                             |
| IgA nephropathy                             | 3 (13.0%)                                                                  |                                                               | 2 (11.1%)                                             |
| Acute tubular necrosis                      |                                                                            |                                                               | 1 (5.6%)                                              |
| ANCA-associated vasculitis                  |                                                                            |                                                               | 1 (5.6%)                                              |
| Focal and segmental glomerulosclerosis      |                                                                            | 2 (6.9%)                                                      |                                                       |
| Monoclonal gammopathy of renal significance |                                                                            |                                                               |                                                       |
| Membranoproliferative glomerulonephritis    |                                                                            | 2 (6.9%)                                                      |                                                       |
| ANCA-negative crescentic glomerulonephritis | 1 (4.3%)                                                                   |                                                               |                                                       |
| Acute glomerulonephritis                    |                                                                            |                                                               |                                                       |
| Chronic interstitial nephritis              |                                                                            |                                                               | 1 (5.6%)                                              |
| Nephrolithiasis                             |                                                                            |                                                               |                                                       |
| Pyelonephritis                              |                                                                            |                                                               |                                                       |
| Lupus nephritis                             | 2 (8.7%)                                                                   |                                                               |                                                       |
| Thrombotic microangioapthy                  |                                                                            |                                                               | 1 (5.6%)                                              |
| Minimal change disease                      |                                                                            | 1 (3.4%)                                                      |                                                       |
| Cholesterol embolism                        |                                                                            |                                                               |                                                       |
| Other drug nephrotoxicity                   |                                                                            | 1 (3.4%)                                                      |                                                       |
| Alport syndrome                             |                                                                            |                                                               |                                                       |
| Membranous nephropathy                      | 1 (4.3%)                                                                   |                                                               |                                                       |
| Toxicity of calcineurin inhibitors          |                                                                            |                                                               |                                                       |
| Anti-glomerular basement membrane disease   |                                                                            |                                                               |                                                       |

**Supplementary Table 5 (continued):** Details of NDHKD diagnoses by biopsy indications in the other atypical features group

|                                                    | <b>Auto-antibodies<br/>(n=15)</b> | <b>Proteinuria recorded prior to<br/>diabetes onset (n=6)</b> | <b>Recipient of non-renal solid<br/>organ transplant (n=11)</b> |
|----------------------------------------------------|-----------------------------------|---------------------------------------------------------------|-----------------------------------------------------------------|
| <b>Acute interstitial nephritis</b>                |                                   |                                                               | 1 (9.1%)                                                        |
| <b>IgA nephropathy</b>                             | 1 (6.7%)                          | 2 (33.3%)                                                     |                                                                 |
| <b>Acute tubular necrosis</b>                      | 1 (6.7%)                          |                                                               |                                                                 |
| <b>ANCA-associated vasculitis</b>                  |                                   |                                                               |                                                                 |
| <b>Focal and segmental glomerulosclerosis</b>      |                                   | 2 (33.3%)                                                     |                                                                 |
| <b>Monoclonal gammopathy of renal significance</b> |                                   |                                                               |                                                                 |
| <b>Membranoproliferative glomerulonephritis</b>    |                                   |                                                               | 1 (9.1%)                                                        |
| <b>ANCA-negative crescentic glomerulonephritis</b> | 3 (20.0%)                         |                                                               |                                                                 |
| <b>Acute glomerulonephritis</b>                    |                                   |                                                               | 1 (9.1%)                                                        |
| <b>Chronic interstitial nephritis</b>              |                                   |                                                               |                                                                 |
| <b>Nephrolithiasis</b>                             |                                   |                                                               |                                                                 |
| <b>Pyelonephritis</b>                              |                                   |                                                               |                                                                 |
| <b>Lupus nephritis</b>                             |                                   |                                                               |                                                                 |
| <b>Thrombotic microangiopathy</b>                  |                                   |                                                               |                                                                 |
| <b>Minimal change disease</b>                      |                                   |                                                               |                                                                 |
| <b>Cholesterol embolism</b>                        |                                   |                                                               |                                                                 |
| <b>Other drug nephrotoxicity</b>                   |                                   |                                                               |                                                                 |
| <b>Alport syndrome</b>                             |                                   |                                                               |                                                                 |
| <b>Membranous nephropathy</b>                      |                                   |                                                               |                                                                 |
| <b>Toxicity of calcineurin inhibitors</b>          |                                   |                                                               | 1 (9.1%)                                                        |
| <b>Anti-glomerular basement membrane disease</b>   | 1 (6.7%)                          |                                                               |                                                                 |

**Supplementary Table 5 (continued):** Details of NDHKD diagnoses by biopsy indications in the other atypical features group

|                                             | <b>Nephrotoxic exposure<br/>(n=6)</b> | <b>Malignancy<br/>(n=14)</b> | <b>Cirrhosis<br/>(n=5)</b> | <b>Familial<br/>history (n=2)</b> | <b>Other<br/>(n=5)</b> |
|---------------------------------------------|---------------------------------------|------------------------------|----------------------------|-----------------------------------|------------------------|
| Acute interstitial nephritis                | 1 (16.7%)                             |                              |                            |                                   |                        |
| IgA nephropathy                             |                                       |                              | 1 (20.0%)                  |                                   |                        |
| Acute tubular necrosis                      |                                       | 1 (7.1%)                     |                            |                                   |                        |
| ANCA-associated vasculitis                  |                                       |                              |                            |                                   |                        |
| Focal and segmental glomerulosclerosis      |                                       |                              |                            |                                   |                        |
| Monoclonal gammopathy of renal significance |                                       |                              |                            |                                   |                        |
| Membranoproliferative glomerulonephritis    |                                       | 1 (7.1%)                     |                            |                                   |                        |
| ANCA-negative crescentic glomerulonephritis |                                       |                              |                            |                                   |                        |
| Acute glomerulonephritis                    |                                       |                              |                            |                                   |                        |
| Chronic interstitial nephritis              | 1 (16.7%)                             |                              |                            | 1 (50.0%)                         |                        |
| Nephrolithiasis                             |                                       |                              |                            |                                   |                        |
| Pyelonephritis                              | 1 (16.7%)                             |                              |                            |                                   |                        |
| Lupus nephritis                             |                                       |                              |                            |                                   |                        |
| Thrombotic microangiopathy                  |                                       |                              | 1 (20.0%)                  |                                   |                        |
| Minimal change disease                      |                                       |                              |                            |                                   |                        |
| Cholesterol embolism                        |                                       |                              |                            |                                   |                        |
| Other drug nephrotoxicity                   |                                       |                              |                            |                                   |                        |
| Alport syndrome                             |                                       |                              |                            | 1 (50.0%)                         |                        |
| Membranous nephropathy                      |                                       |                              |                            |                                   |                        |
| Toxicity of calcineurin inhibitors          |                                       |                              |                            |                                   |                        |
| Anti-glomerular basement membrane disease   |                                       |                              |                            |                                   |                        |

**Supplementary Table 6:** Comparison of patients with complete observation to the total population

|                                                                                   | Total population    | With complete observations | pvalue       |
|-----------------------------------------------------------------------------------|---------------------|----------------------------|--------------|
| n (%)                                                                             | 463                 | 287 (62.0%)                |              |
| Male gender, n (%) <sup>a</sup>                                                   | 219 (47.3%)         | 136 (47.4%)                | 1.000        |
| Age, median [IQR] (years) <sup>a</sup>                                            | 65 [58;72]          | 65 [57;72]                 | 0.699        |
| Age > 65 yo, n (%) <sup>a</sup>                                                   | 225 (48.6%)         | 137 (47.7%)                | 0.830        |
| High blood pressure, n (%) <sup>b</sup>                                           | 400 (87.1%)         | 261 (90.9%)                | 0.128        |
| eGFR(CKD-EPI), median [IQR] (ml/min/1.73m <sup>2</sup> ) <sup>c</sup>             | 25 [13;43]          | 25 [15;42.5]               | 0.672        |
| eGFR(CKD-EPI) > 15 ml/min/1.73m <sup>2</sup> , n (%) <sup>c</sup>                 | 320 (69.4%)         | 210 (73.2%)                | 0.280        |
| eGFR(CKD-EPI) slope, median [IQR] (ml/min/1.73m <sup>2</sup> /month) <sup>d</sup> | -3.45 [-8.75;-1.16] | -3.15 [-7.09;-1.18]        | 0.371        |
| UPCR, median [IQR] (g/mmol) <sup>e</sup>                                          | 0.29 [0.11;0.6]     | 0.3 [0.13;0.64]            | 0.430        |
| UPCR > 0.3g/mmol, n (%) <sup>e</sup>                                              | 198 (47.6%)         | 142 (49.5%)                | 0.642        |
| Hematuria, n (%) <sup>f</sup>                                                     | 208 (46.8%)         | 130 (45.3%)                | 0.697        |
| Diabetic retinopathy status, n (%) <sup>a</sup>                                   |                     |                            | <b>0.033</b> |
| No diabetic retinopathy                                                           | 234 (50.5%)         | 161 (56.1%)                |              |
| Non-proliferative diabetic retinopathy                                            | 63 (13.6%)          | 47 (16.4%)                 |              |
| Proliferative diabetic retinopathy                                                | 37 (8%)             | 26 (9.1%)                  |              |
| Unknown                                                                           | 129 (27.9%)         | 53 (18.5%)                 |              |
| HbA1c, median [IQR] (%) <sup>g</sup>                                              | 6.9 [6.2;8.1]       | 7 [6.25;8.2]               | 0.480        |
| HbA1c > 7% , n (%) <sup>g</sup>                                                   | 164 (44%)           | 132 (46%)                  | 0.646        |
| Diabetes duration, median [IQR] (years) <sup>h</sup>                              | 10 [4;16]           | 10 [4;17]                  | 0.386        |
| Diabetes duration > 5 years, n (%) <sup>h</sup>                                   | 251 (64.4%)         | 196 (68.3%)                | 0.280        |
| Short or unknown duration of diabetes, n(%) <sup>h</sup>                          | 53 (13.6%)          | 35 (12.2%)                 | 0.635        |

Missing data: a=0 (0%) ; b=4 (1%) ; c=2 (0%) ; d=146 (32%) ; e=47 (10%) ; f=19 (4%) ; g=90 (19%) ; h=73 (16%)

**Supplementary Table 7** Logistic regression analyses of predictors of NDHKD in the subpopulation without other atypical feature

|                                                       | Non-adjusted |              |              | Model 1    |              |              | Model 2    |              |              |
|-------------------------------------------------------|--------------|--------------|--------------|------------|--------------|--------------|------------|--------------|--------------|
|                                                       |              |              |              |            |              |              |            |              |              |
|                                                       | Odds ratio   | 95% CI       | p-value      | Odds ratio | 95% CI       | p-value      | Odds ratio | 95% CI       | p-value      |
| <b>Male gender</b>                                    |              |              | 0.8          |            |              |              |            |              |              |
| Yes                                                   | 0.90         | [0.39-2.06]  | 0.8          |            |              |              |            |              |              |
| <b>Age &gt; 65 yrs</b>                                |              |              | 0.1          |            |              |              |            |              |              |
| Yes                                                   | 2.01         | [0.88-4.75]  | 0.104        |            |              |              |            |              |              |
| <b>High blood pressure</b>                            |              |              | 0.159        |            |              |              |            |              |              |
| Yes                                                   | 0.38         | [0.11-1.51]  | 0.137        |            |              |              |            |              |              |
| <b>eGFR(CKD-EPI) &gt; 15 ml/min/1.73m<sup>2</sup></b> |              |              | 0.419        |            |              | <b>0.019</b> |            |              | 0.055        |
| Yes                                                   | 0.68         | [0.28-1.79]  | 0.411        | 0.13       | [0.02-0.59]  | 0.012        | 0.20       | [0.05-0.80]  | 0.026        |
| <b>UPCR &gt; 0.3g/mmol</b>                            |              |              | 0.424        |            |              | <b>0.095</b> |            |              | 0.116        |
| Yes                                                   | 0.70         | [0.29-1.71]  | 0.422        | 0.30       | [0.06-1.24]  | 0.103        | 0.35       | [0.09-1.29]  | 0.124        |
| <b>Hematuria</b>                                      |              |              | <b>0.007</b> |            |              | <b>0.177</b> |            |              | 0.112        |
| Yes                                                   | 3.30         | [1.39-8.29]  | 0.008        | 5.31       | [1.30-27.09] | 0.028        | 4.15       | [1.21-15.85] | 0.028        |
| <b>Diabetic retinopathy</b>                           |              |              | <b>0.002</b> |            |              | <b>0.009</b> |            |              |              |
| Non-proliferative diabetic retinopathy                | 0.72         | [0.11-2.94]  | 0.682        | 1.70       | [0.18-12.27] | 0.607        |            |              |              |
| Proliferative diabetic retinopathy                    | 1.13         | [0.16-4.81]  | 0.882        | 1.63       | [0.07-18.33] | 0.708        |            |              |              |
| Unknown                                               | 6.33         | [2.38-17.31] | <0.001       | 14.76      | [3.05-93.53] | 0.002        |            |              |              |
| <b>HbA1c &gt; 7%</b>                                  |              |              | 0.065        |            |              | <b>0.013</b> |            |              | <b>0.011</b> |
| Yes                                                   | 0.40         | [0.14-1.06]  | 0.076        | 0.16       | [0.02-0.88]  | 0.050        | 0.22       | [0.04-0.87]  | 0.044        |
| <b>Diabetes duration &gt; 5 years</b>                 |              |              | 0.049        |            |              | <b>0.196</b> |            |              | 0.112        |
| Yes                                                   | 0.40         | [0.16-0.99]  | 0.049        | 0.56       | [0.10-2.75]  | 0.470        | 0.45       | [0.11-1.74]  | 0.249        |

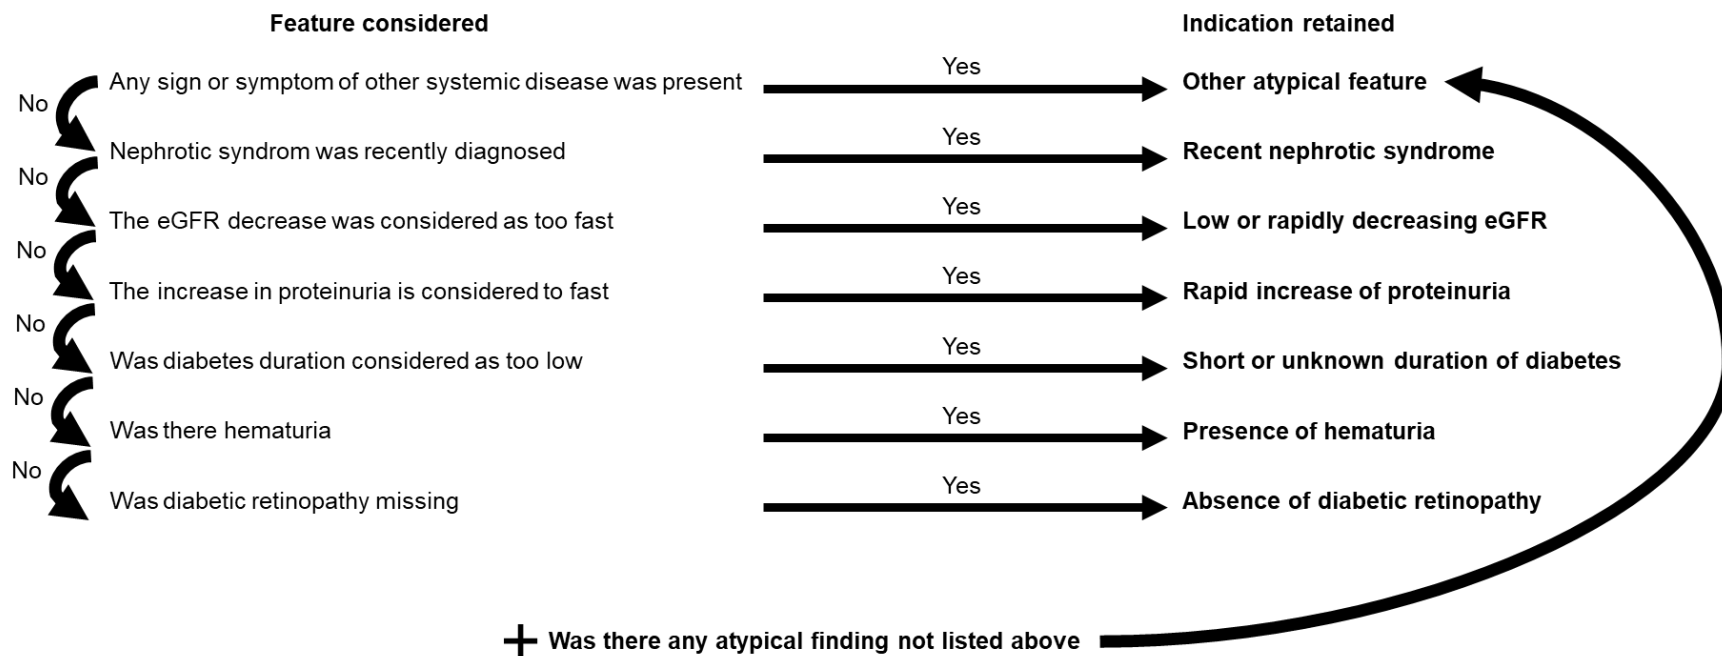

**Supplementary Figure 1: Schematic representation of the process of attribution of an indication to each biopsy.**

**Supplementary Figure 2: Atypical features compulsory or potentially present in each indication group.** Biopsy indications are represented as rows and individual feature as columns. Black shaded cells represent a feature compulsory in the row indication and cannot be found in the following ones. Grey shaded cells represent features which may be present in the row indication.

| Atypical feature<br>Biopsy indications    | <i>Other atypical feature</i> | <i>Recent onset of nephrotic syndrome</i> | <i>Low or rapidly declining eGFR</i> | <i>Absence of proteinuria</i> | <i>Rapid increase of proteinuria</i> | <i>Short duration of diabetes</i> | <i>Presence of hematuria</i> | <i>Absence of retinopathy</i> |
|-------------------------------------------|-------------------------------|-------------------------------------------|--------------------------------------|-------------------------------|--------------------------------------|-----------------------------------|------------------------------|-------------------------------|
| <i>Other atypical feature</i>             |                               |                                           |                                      |                               |                                      |                                   |                              |                               |
| <i>Recent onset of nephrotic syndrome</i> |                               |                                           |                                      |                               |                                      |                                   |                              |                               |
| <i>Low or rapidly declining eGFR</i>      |                               |                                           |                                      |                               |                                      |                                   |                              |                               |
| <i>Absence of proteinuria</i>             |                               |                                           |                                      |                               |                                      |                                   |                              |                               |
| <i>Rapid increase of proteinuria</i>      |                               |                                           |                                      |                               |                                      |                                   |                              |                               |
| <i>Short duration of diabetes</i>         |                               |                                           |                                      |                               |                                      |                                   |                              |                               |
| <i>Hematuria</i>                          |                               |                                           |                                      |                               |                                      |                                   |                              |                               |
| <i>Missing diabetic retinopathy</i>       |                               |                                           |                                      |                               |                                      |                                   |                              |                               |

1   **REFERENCES**

- 2   1.    Summary of Recommendation Statements. *Kidney International Supplements* 2012; 2: 8–12.
- 3   2.    Levey AS, Eckardt K-U, Dorman NM et al. Nomenclature for kidney function and disease: report
- 4       of a Kidney Disease: Improving Global Outcomes (KDIGO) Consensus Conference. *Kidney*
- 5       International 2020; 97: 1117–1129.

6
